# Supplementary material for: Accurate Physical Property Predictions via Deep Learning
Source: MDPI journal article supplement (doi:10.3390/molecules27051668), 2022-03-03
Supplement: s1 [file s1]

# Supporting Information: Accurate physical property predictions via deep learning

Yuanyuan Hou<sup>1,2</sup>, Shiyu Wang<sup>1</sup>, H.C. Stephen Chan<sup>1\*</sup>, Shuguang Yuan<sup>1\*</sup>

<sup>1</sup> Research Center for Computer-aided Drug Discovery, Shenzhen Institute of Chinese Academy of Sciences, Shenzhen, China

<sup>2</sup> University of Chinese Academy of Sciences, Beijing, China

\* Correspondence: shuguang.yuan@siat.ac.cn, xc.chen@siat.ac.cn

Supplementary Table S1. The training hyperparameters of the GCN model.

| Hyperparameter         | Value     |
|------------------------|-----------|
| learning_rate          | 0.002     |
| weight_decay           | 0         |
| patience               | 30        |
| batch_size             | 128       |
| dropout                | 0.05      |
| gnn_hidden_feats       | 256       |
| predictor_hidden_feats | 128       |
| num_gnn_layers         | 3         |
| residual               | True      |
| batchnorm              | false     |
| n_tasks                | 1         |
| atom_featurizer_type   | canonical |
| bond_featurizer_type   | canonical |
| in_node_feats          | 74        |

Supplementary Table S2. The training hyperparameters of the AttentiveFP model.

| Hyperparameter       | Value     |
|----------------------|-----------|
| learning_rate        | 0.0003    |
| weight_decay         | 0         |
| patience             | 30        |
| batch_size           | 128       |
| dropout              | 0         |
| num_layers           | 3         |
| num_timesteps        | 2         |
| graph_feat_size      | 200       |
| n_tasks              | 1         |
| atom_featurizer_type | canonical |
| bond_featurizer_type | canonical |
| in_node_feats        | 74        |
| In_edge_feats        | 13        |

Supplementary Table S3. The training hyperparameters of the MPNN model.

| Hyperparameter           | Value     |
|--------------------------|-----------|
| learning_rate            | 0.0003    |
| weight_decay             | 0         |
| patience                 | 30        |
| batch_size               | 128       |
| node_out_feats           | 64        |
| edge_hidden_feats        | 128       |
| num_step_message_passing | 6         |
| num_step_set2set         | 6         |
| num_layer_set2set        | 3         |
| n_tasks                  | 1         |
| atom_featurizer_type     | canonical |
| bond_featurizer_type     | canonical |
| in_node_feats            | 74        |
| In_edge_feats            | 13        |

Supplementary Table S4. The training hyperparameters of logP with the BCSA model.

| Hyperparameter  | Value   |
|-----------------|---------|
| batch_size      | 1024    |
| vocab_size      | 120     |
| smiles_max_len  | 200     |
| hidden_size     | 64      |
| number_layers   | 3       |
| dropout         | 0.12215 |
| mlp_hidden_size | 32      |
| learning_rate   | 0.00966 |

Supplementary Table S5. The training hyperparameters of logD with BCSA model.

| Hyperparameter  | Value   |
|-----------------|---------|
| batch_size      | 512     |
| vocab_size      | 120     |
| smiles_max_len  | 200     |
| hidden_size     | 64      |
| number_layers   | 5       |
| dropout         | 0.41296 |
| mlp_hidden_size | 32      |
| learning_rate   | 0.00708 |
